# Supplementary material for: Axial Length and Prevalence of Myopia among Schoolchildren in the Equatorial Region of Brazil
Source: PubMed Central journal article supplement (PMC7794886; doi:10.3390/jcm10010115), 2020-12-31
Supplement: jcm-10-00115-s001.pdf [file jcm-10-00115-s001.pdf]

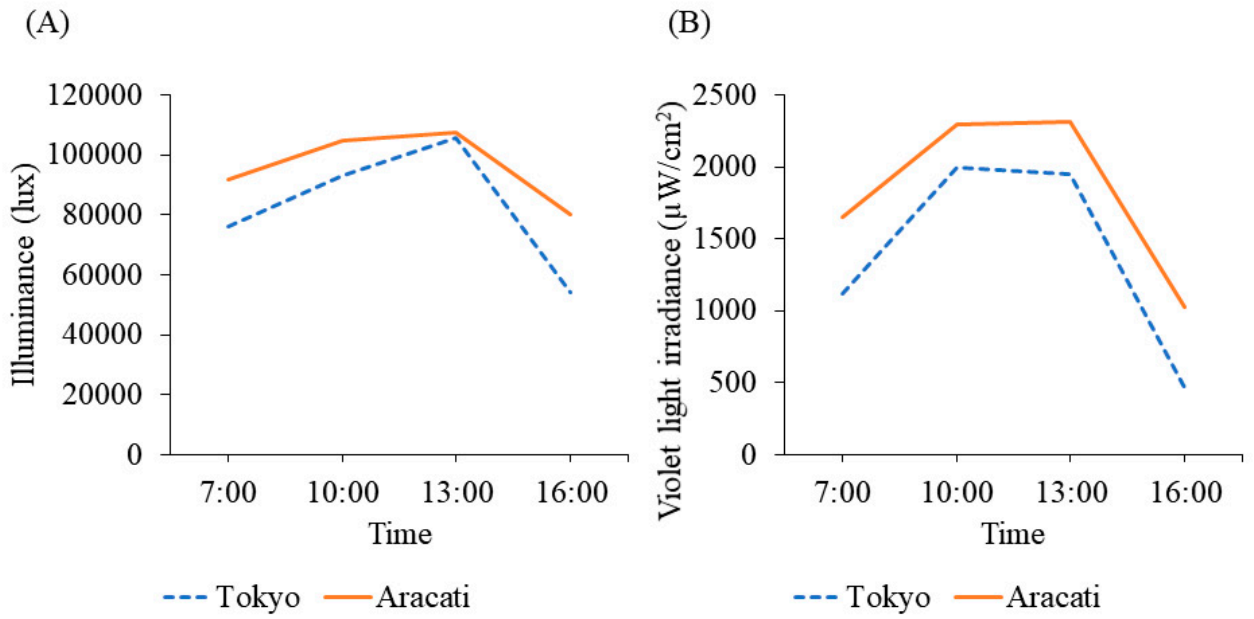

**Figure 1.** The illuminance and violet light irradiance in Tokyo and Aracati. The illuminance and violet light irradiance in Aracati and Tokyo are shown in Figure S1 (A) and (B). (A) The average illuminance during the day in Aracati is almost the same as in Tokyo. (B) The average violet light irradiance during the day in Aracati is higher than in Tokyo.
